# Supplementary material for: What about TSH and Anti-Thyroid Antibodies in Patients with Autoimmune Thyroiditis and Celiac Disease Using a Gluten-Free Diet? A Systematic Review
Source: MDPI journal article supplement (doi:10.3390/nu14081681), 2022-04-18
Supplement: s1 [file s1]

**Supplementary Table S1: MOOSE (Meta-analyses Of Observational Studies in Epidemiology) Checklist**

| Item No                                     | Recommendation                                                                                                                                                                                                                                                               | Page |
|---------------------------------------------|------------------------------------------------------------------------------------------------------------------------------------------------------------------------------------------------------------------------------------------------------------------------------|------|
| Reporting of background should include      |                                                                                                                                                                                                                                                                              |      |
| 1                                           | Problem definition                                                                                                                                                                                                                                                           | 3    |
| 2                                           | Hypothesis statement                                                                                                                                                                                                                                                         | 3    |
| 3                                           | Description of study outcome(s)                                                                                                                                                                                                                                              | 3    |
| 4                                           | Type of exposure or intervention used                                                                                                                                                                                                                                        | 3    |
| 5                                           | Type of study designs used                                                                                                                                                                                                                                                   | 3    |
| 6                                           | Study population                                                                                                                                                                                                                                                             | 3    |
| Reporting of search strategy should include |                                                                                                                                                                                                                                                                              |      |
| 7                                           | Qualifications of searchers (eg, librarians and investigators)                                                                                                                                                                                                               | 3    |
| 8                                           | Search strategy, including time period included in the synthesis and key words                                                                                                                                                                                               | 3    |
| 9                                           | Effort to include all available studies, including contact with authors                                                                                                                                                                                                      | 3    |
| 10                                          | Databases and registries searched                                                                                                                                                                                                                                            | 3    |
| 11                                          | Search software used, name and version, including special features used (eg, explosion)                                                                                                                                                                                      | 3    |
| 12                                          | Use of hand searching (eg, reference lists of obtained articles)                                                                                                                                                                                                             | 3    |
| 13                                          | List of citations located and those excluded, including justification                                                                                                                                                                                                        | 3    |
| 14                                          | Method of addressing articles published in languages other than English                                                                                                                                                                                                      | 3    |
| 15                                          | Method of handling abstracts and unpublished studies                                                                                                                                                                                                                         | 3    |
| 16                                          | Description of any contact with authors                                                                                                                                                                                                                                      | 3    |
| Reporting of methods should include         |                                                                                                                                                                                                                                                                              |      |
| 17                                          | Description of relevance or appropriateness of studies assembled for assessing the hypothesis to be tested                                                                                                                                                                   | 3    |
| 18                                          | Rationale for the selection and coding of data (eg, sound clinical principles or convenience)                                                                                                                                                                                | 3    |
| 19                                          | Documentation of how data were classified and coded (eg, multiple raters, blinding and interrater reliability)                                                                                                                                                               | 3    |
| 20                                          | Assessment of confounding (eg, comparability of cases and controls in studies where appropriate)                                                                                                                                                                             | 3    |
| 21                                          | Assessment of study quality, including blinding of quality assessors, stratification or regression on possible predictors of study results                                                                                                                                   | 3    |
| 22                                          | Assessment of heterogeneity                                                                                                                                                                                                                                                  | 3    |
| 23                                          | Description of statistical methods (eg, complete description of fixed or random effects models, justification of whether the chosen models account for predictors of study results, dose-response models, or cumulative meta-analysis) in sufficient detail to be replicated | 3    |
| 24                                          | Provision of appropriate tables and graphics                                                                                                                                                                                                                                 | 3    |
| Reporting of results should include         |                                                                                                                                                                                                                                                                              |      |
| 25                                          | Graphic summarizing individual study estimates and overall estimate                                                                                                                                                                                                          | 4    |
| 26                                          | Table giving descriptive information for each study included                                                                                                                                                                                                                 | 4    |
| 27                                          | Results of sensitivity testing (eg, subgroup analysis)                                                                                                                                                                                                                       | 4    |
| 28                                          | Indication of statistical uncertainty of findings                                                                                                                                                                                                                            | 4    |
| Reporting of discussion should include      |                                                                                                                                                                                                                                                                              |      |
| 29                                          | Quantitative assessment of bias (eg, publication bias)                                                                                                                                                                                                                       | 4    |
| 30                                          | Justification for exclusion (eg, exclusion of non-English language citations)                                                                                                                                                                                                | 4    |
| 31                                          | Assessment of quality of included studies                                                                                                                                                                                                                                    | 4    |
| Reporting of conclusions should include     |                                                                                                                                                                                                                                                                              |      |
| 32                                          | Consideration of alternative explanations for observed results                                                                                                                                                                                                               | 4-5  |
| 33                                          | Generalization of the conclusions (ie, appropriate for the data presented and within the domain of the literature review)                                                                                                                                                    | 4-5  |
| 34                                          | Guidelines for future research                                                                                                                                                                                                                                               | 5    |
| 35                                          | Disclosure of funding source                                                                                                                                                                                                                                                 | 1    |

From: Stroup DF, Berlin JA, Morton SC, et al, for the Meta-analysis Of Observational Studies in Epidemiology (MOOSE) Group. Meta-analysis of Observational Studies in Epidemiology. A Proposal for Reporting. *JAMA*. 2000;283(15):2008-2012. doi: 10.1001/jama.283.15.2008.
